# Supplementary material
Source: PubMed Central journal article supplement (PMC5619973)
Supplement: ASN.2017020174SupplementaryData.pdf [file ASN.2017020174SupplementaryData.pdf]

**Title:** FSGS as an adaptive response to growth-induced podocyte stress

Nishizono et al.

**Supplemental Table 1**

|                                | <b>n</b> | <b>Weight<br/>(g)</b> | <b>Δ weight<br/>(%)</b> | <b>Ucreatinine<br/>(mg/24hrs)</b> | <b>Ucreatinine<br/>(% change)</b> | <b>Uurea<br/>(mg/24hrs)</b> | <b>Uprotein<br/>(mg/24hrs)</b> | <b>UProtCR</b> | <b>GS<br/>(%)</b> | <b>Protection</b> |
|--------------------------------|----------|-----------------------|-------------------------|-----------------------------------|-----------------------------------|-----------------------------|--------------------------------|----------------|-------------------|-------------------|
| Time of nephrectomy            | 49       | 297±3                 |                         | 9.4±1.0                           |                                   | 527±47                      | 13±1                           | 1.5±0.2        | 0                 |                   |
| <b>At end of 16 week study</b> |          |                       |                         |                                   |                                   |                             |                                |                |                   |                   |
| Regular diet                   | 6        | 374±14                | +26%                    | 13.4±0.7                          | +43%                              | 1,071±22                    | 75±10                          | 5.5±0.6        | 39±6              | No                |
| 40% Calorie reduction          | 6        | 237±5                 | -20%                    | 7.2±0.2                           | -24%                              | 580±45                      | 7±1                            | 1.0±0.2        | 0                 | Yes               |
| 20% Calorie reduction          | 6        | 296±5                 | 0%                      | 7.9±0.6                           | -16%                              | 495±15                      | 11±1                           | 1.4±0.2        | 0                 | Yes               |
| High protein                   | 8        | 368±15                | +24%                    | 11.6±0.9                          | +23%                              | 1,574±115                   | 61±7                           | 5.7±0.6        | 38±8              | No                |
| Low protein                    | 7        | 410±7                 | +38%                    | 11.0±0.9                          | +11%                              | 128±44                      | 13±2                           | 1.2±0.2        | 0                 | Yes               |
| High fat                       | 5        | 406±7                 | +37%                    | 10.9±0.4                          | +16%                              | 548±36                      | 26±4                           | 2.4±0.3        | 15±5              | Partial           |
| High fat + sucrose             | 6        | 405±9                 | +36%                    | 12.6±1.1                          | +34%                              | 664±34                      | 75±4                           | 6.1±0.4        | 32±9              | No                |
| Regular diet + sucrose         | 5        | 401±3                 | +35%                    | 13.8±0.4                          | +47%                              | 639±25                      | 76±10                          | 5.5±0.9        | 35±5              | No                |

**Supplemental Table 1. Legend: Effect of modulating diet on post-nephrectomy hypertrophic glomerular injury.** To simulate hypertrophic events post implantation adult heterozygous AA-4E-BP1 transgenic rats were nephrectomized at 300g and then placed on various diets for 14 weeks to determine the extent to which post-nephrectomy dietary modulation could protect against hypertrophic stress-induced glomerular injury. Urine creatinine excretion per 24 hours is a measure of muscle mass. The change in 24hour urine creatinine is a measure of change in muscle mass on the diet. Urine urea excretion per 24 hours was used to assess protein intake and catabolism. Urine protein excretion per 24 hours was used to assess the glomerular protein leak. Glomerulosclerosis (GS) (% glomeruli with adhesions) was used to assess degree of glomerular injury. 40% calorie restriction provided kidney protection but was associated with weight loss and loss of muscle mass and a higher than expected urea excretion suggesting that these animals may have been catabolic. 20% calorie restriction also provided good protection and was not associated with weight loss although muscle mass did decrease 16% over 16 weeks. Low protein diet provided protection, allowed weight gain and did not reduce muscle mass over the 16week period of observation. High fat diet provided partial protection possibly because of associated moderately reduced protein and carbohydrate intake, but if carbohydrate was added as 10% sucrose to drinking water to simulate drinking commercially available beverages (sodas) containing sugar the protection was lost. Regular diet with 10% sucrose added to drinking water significantly reduced urine urea excretion demonstrating that animals preferred drinking sweetened water to eating regular food. High protein diet was not different from regular diet by any criterion measured. These data demonstrate how nephrectomy-induced hypertrophic events can be significantly impacted by modulating diet.

**Supplemental Table 2**

| <b>Symbol</b>   | <b>TG.1K.CRD</b> | <b>TG.1K.Rapa</b> | <b>TG.1K.ACEi</b> |
|-----------------|------------------|-------------------|-------------------|
| <i>Aars</i>     | -0.386           | -0.253            | -0.185            |
| <i>Abcb1b</i>   | -0.757           | -0.802            | -0.938            |
| <i>Abcc2</i>    | -0.831           | -0.471            | -0.506            |
| <i>Abhd17c</i>  | -0.474           | -0.728            | -0.431            |
| <i>Ablim1</i>   | -0.179           | -0.14             | -0.393            |
| <i>Acox3</i>    | -0.31            | -0.204            | -0.151            |
| <i>Adam15</i>   | -0.416           | -0.336            | -0.42             |
| <i>Adap1</i>    | -0.515           | -0.912            | -0.569            |
| <i>Adh1</i>     | -0.475           | -1.468            | -0.581            |
| <i>Adrm1</i>    | -0.22            | -0.455            | -0.179            |
| <i>Agpat4</i>   | 0.191            | 0.195             | 0.323             |
| <i>Agtrap</i>   | -0.306           | -0.237            | -0.226            |
| <i>Agxt2</i>    | -0.507           | -0.666            | -0.57             |
| <i>Ahcyl1</i>   | 0.097            | 0.135             | 0.115             |
| <i>Aifm1</i>    | -0.271           | -0.21             | -0.346            |
| <i>Ak2</i>      | -0.531           | -0.79             | -0.494            |
| <i>Akap9</i>    | 0.223            | 0.187             | 0.223             |
| <i>Akr1a1</i>   | -0.494           | -0.305            | -0.296            |
| <i>Aldh7a1</i>  | -0.373           | -0.501            | -0.402            |
| <i>Aldob</i>    | -0.234           | -0.314            | -0.335            |
| <i>Alkbh3</i>   | -0.134           | -0.417            | -0.198            |
| <i>Ankle1</i>   | -0.515           | -0.654            | -0.746            |
| <i>Ankrd44</i>  | 0.337            | 0.605             | 0.303             |
| <i>Apcs</i>     | -0.553           | -1.447            | -0.658            |
| <i>Apeh</i>     | -0.239           | -0.171            | -0.239            |
| <i>Arap2</i>    | 0.451            | 0.68              | 0.453             |
| <i>Arhgef18</i> | 0.646            | 0.21              | 0.282             |
| <i>Arhgef25</i> | -0.266           | -0.525            | -0.338            |
| <i>Arhgef26</i> | 0.371            | 0.362             | 0.444             |
| <i>Arid4a</i>   | 0.378            | 0.709             | 0.506             |
| <i>Aspm</i>     | -1.376           | -0.712            | -0.598            |
| <i>Atf7ip</i>   | 0.203            | 0.149             | 0.244             |
| <i>Atg13</i>    | 0.248            | 0.54              | 0.209             |
| <i>Atp11c</i>   | 0.25             | 0.548             | 0.293             |
| <i>Atp5a1</i>   | -0.22            | -0.189            | -0.309            |
| <i>Atp6v0d1</i> | -0.201           | -0.451            | -0.209            |
| <i>Atp6v1b2</i> | -0.378           | -0.481            | -0.361            |
| <i>Atp6v1c1</i> | -0.205           | -0.282            | -0.217            |
| <i>Atraid</i>   | -0.286           | -0.18             | -0.299            |
| <i>Atrx</i>     | 0.26             | 0.292             | 0.34              |
| <i>Aurkb</i>    | -1.121           | -1.068            | -0.563            |
| <i>B3gat1</i>   | -1.42            | -2.803            | -1.458            |
| <i>Bcl2</i>     | 0.275            | 0.86              | 0.463             |

|                 |        |        |        |
|-----------------|--------|--------|--------|
| <i>Bdp1</i>     | 0.337  | 0.362  | 0.299  |
| <i>Blzf1</i>    | 0.308  | 0.368  | 0.268  |
| <i>Bmp2</i>     | -0.631 | -1.321 | -0.574 |
| <i>Boc</i>      | 0.389  | 0.482  | 0.506  |
| <i>Bub1</i>     | -1.395 | -0.957 | -0.699 |
| <i>Bub1b</i>    | -0.932 | -0.808 | -0.481 |
| <i>C4b</i>      | -1.408 | -1.806 | -1.287 |
| <i>C7</i>       | -1.259 | -1.741 | -0.854 |
| <i>Cachd1</i>   | 0.315  | 0.474  | 0.262  |
| <i>Cacnb2</i>   | 0.477  | 0.892  | 0.906  |
| <i>Calml4</i>   | -0.281 | -0.437 | -0.259 |
| <i>Capg</i>     | -0.943 | -0.633 | -0.877 |
| <i>Car7</i>     | -0.933 | -0.619 | -0.397 |
| <i>Cb707485</i> | -0.569 | -0.57  | -0.742 |
| <i>Cbs</i>      | -0.437 | -0.761 | -0.431 |
| <i>Ccbl1</i>    | -0.425 | -0.977 | -0.56  |
| <i>Ccdc102a</i> | -0.386 | -0.326 | -0.294 |
| <i>Ccl2</i>     | -0.548 | -0.818 | -0.656 |
| <i>Ccna2</i>    | -1.113 | -0.728 | -0.383 |
| <i>Ccnb1</i>    | -1.371 | -1.055 | -0.63  |
| <i>Ccnb2</i>    | -2.034 | -1.715 | -0.703 |
| <i>Cd276</i>    | -0.539 | -0.543 | -0.36  |
| <i>Cd2ap</i>    | 0.529  | 0.307  | 0.285  |
| <i>Cd63</i>     | -0.349 | -0.57  | -0.308 |
| <i>Cdc14a</i>   | 0.409  | 0.174  | 0.184  |
| <i>Cdc20</i>    | -1.649 | -0.819 | -0.907 |
| <i>Cdc25c</i>   | -0.53  | -0.66  | -0.477 |
| <i>Cdc73</i>    | 0.264  | 0.161  | 0.193  |
| <i>Cdk1</i>     | -1.591 | -0.679 | -0.489 |
| <i>Cdkn2c</i>   | -1.204 | -0.648 | -0.742 |
| <i>Cdkn3</i>    | -1.684 | -1.024 | -0.78  |
| <i>Cdsn</i>     | -0.934 | -1.674 | -1.22  |
| <i>Cenpe</i>    | -1.267 | -0.844 | -0.514 |
| <i>Cenpf</i>    | -1.458 | -1.047 | -0.911 |
| <i>Cenpi</i>    | -0.4   | -0.377 | -0.304 |
| <i>Cenpt</i>    | -0.505 | -0.599 | -0.437 |
| <i>Cep170b</i>  | -0.202 | -1.031 | -0.334 |
| <i>Cfi</i>      | -1.034 | -0.78  | -0.694 |
| <i>Cflar</i>    | 0.211  | 0.44   | 0.245  |
| <i>Cib1</i>     | -0.347 | -0.418 | -0.381 |
| <i>Clasp2</i>   | 0.184  | 0.371  | 0.222  |
| <i>Clec1a</i>   | 0.293  | 0.802  | 0.342  |
| <i>Clmp</i>     | -0.706 | -0.633 | -0.63  |
| <i>Clta</i>     | -0.114 | -0.169 | -0.17  |
| <i>Cluh</i>     | -0.236 | -0.266 | -0.308 |
| <i>Cndp2</i>    | -0.549 | -0.403 | -0.444 |

|                |        |        |        |
|----------------|--------|--------|--------|
| <i>Cnnm1</i>   | -0.555 | -0.713 | -0.387 |
| <i>Cnot4</i>   | 0.099  | 0.209  | 0.198  |
| <i>Cntnap1</i> | -0.446 | -1.359 | -0.766 |
| <i>Col16a1</i> | -0.346 | -0.723 | -0.358 |
| <i>Col3a1</i>  | -1.034 | -1.613 | -1.11  |
| <i>Col5a1</i>  | -0.515 | -0.951 | -0.255 |
| <i>Col6a6</i>  | -1.112 | -1.859 | -0.979 |
| <i>Coq9</i>    | -0.296 | -0.373 | -0.314 |
| <i>Cox6a1</i>  | -0.523 | -0.392 | -0.388 |
| <i>Cpd</i>     | 0.286  | 0.267  | 0.266  |
| <i>Cpne3</i>   | 0.121  | 0.347  | 0.174  |
| <i>Cpne7</i>   | -0.377 | -1.786 | -0.796 |
| <i>Crebbp</i>  | 0.197  | 0.18   | 0.256  |
| <i>Crip1</i>   | -0.552 | -0.54  | -0.73  |
| <i>Cript</i>   | 0.373  | 0.717  | 0.367  |
| <i>Csnk1a1</i> | 0.093  | 0.138  | 0.127  |
| <i>Csrnp2</i>  | 0.36   | 0.466  | 0.348  |
| <i>Ctsb</i>    | -0.38  | -0.52  | -0.227 |
| <i>Cxcr2</i>   | 0.563  | 1.449  | 1.193  |
| <i>Cyp24a1</i> | -1.249 | -1.823 | -1.142 |
| <i>Cytip</i>   | 0.421  | 0.929  | 0.815  |
| <i>Dab2</i>    | -0.163 | -0.518 | -0.298 |
| <i>Dact2</i>   | -0.363 | -0.727 | -0.898 |
| <i>Dad1</i>    | -0.453 | -0.315 | -0.249 |
| <i>Dao</i>     | -0.382 | -0.796 | -0.45  |
| <i>Dap</i>     | -0.27  | -0.742 | -0.301 |
| <i>Dcn</i>     | -1.277 | -1.097 | -1.096 |
| <i>Dctn2</i>   | -0.204 | -0.182 | -0.223 |
| <i>Dcxr</i>    | -0.331 | -1.1   | -0.771 |
| <i>Ddx19a</i>  | -0.373 | -0.294 | -0.441 |
| <i>Decr2</i>   | -0.465 | -0.658 | -0.354 |
| <i>Depdc1</i>  | -1.063 | -0.743 | -0.661 |
| <i>Dera</i>    | -0.352 | -0.479 | -0.18  |
| <i>Dgcr8</i>   | 0.344  | 0.401  | 0.293  |
| <i>Dhh</i>     | -0.785 | -0.593 | -0.843 |
| <i>Dhrs1</i>   | -0.191 | -0.508 | -0.263 |
| <i>Dhrs11</i>  | -0.507 | -0.441 | -0.708 |
| <i>Diaph3</i>  | -1.622 | -1.238 | -0.741 |
| <i>Dlc1</i>    | 0.315  | 0.456  | 0.441  |
| <i>Dlgap5</i>  | -1.472 | -0.796 | -0.681 |
| <i>Dll1</i>    | -0.308 | -0.436 | -0.47  |
| <i>Dll4</i>    | 0.44   | 1.659  | 1.207  |
| <i>Dmxl1</i>   | 0.159  | 0.167  | 0.186  |
| <i>Dnajb4</i>  | 0.249  | 0.557  | 0.415  |
| <i>Dnpep</i>   | -0.296 | -0.247 | -0.236 |
| <i>Dpep2</i>   | -0.39  | -1.165 | -0.79  |

|                |        |        |        |
|----------------|--------|--------|--------|
| <i>Dph5</i>    | -0.263 | -0.292 | -0.259 |
| <i>Dph6</i>    | 0.254  | 0.767  | 0.257  |
| <i>Dpp7</i>    | -0.624 | -1.794 | -0.463 |
| <i>Dpy19l4</i> | 0.254  | 0.577  | 0.258  |
| <i>Dpys</i>    | -0.335 | -0.769 | -0.619 |
| <i>Dynlt3</i>  | 0.174  | 0.276  | 0.17   |
| <i>E2f7</i>    | -0.682 | -0.729 | -0.516 |
| <i>Eapp</i>    | 0.446  | 0.793  | 0.41   |
| <i>Eci3</i>    | -0.498 | -0.514 | -0.477 |
| <i>Ecsit</i>   | -0.29  | -0.599 | -0.215 |
| <i>Ect2</i>    | -1.604 | -0.952 | -0.59  |
| <i>Efnb2</i>   | 0.257  | 0.89   | 0.632  |
| <i>Eif3a</i>   | 0.123  | 0.13   | 0.139  |
| <i>Elmo1</i>   | -0.315 | -0.348 | -0.433 |
| <i>Ero1a</i>   | 0.461  | 0.19   | 0.404  |
| <i>Esf1</i>    | 0.302  | 0.312  | 0.271  |
| <i>Etfb</i>    | -0.259 | -0.147 | -0.237 |
| <i>Exnef</i>   | -0.356 | -0.418 | -0.411 |
| <i>Ezh1</i>    | 0.14   | 0.391  | 0.18   |
| <i>Ezh2</i>    | -0.758 | -0.517 | -0.365 |
| <i>Fabp4</i>   | -1.193 | -0.786 | -1.247 |
| <i>Fam111a</i> | -1.628 | -1.055 | -0.77  |
| <i>Fam179b</i> | 0.308  | 0.318  | 0.275  |
| <i>Fam208a</i> | 0.2    | 0.439  | 0.318  |
| <i>Fam98a</i>  | -0.113 | -0.174 | -0.17  |
| <i>Fblim1</i>  | -0.526 | -0.894 | -0.516 |
| <i>Fbxw5</i>   | -0.306 | -0.334 | -0.212 |
| <i>Fga</i>     | -1.187 | -0.617 | -1.222 |
| <i>Fgfr4</i>   | -0.418 | -0.789 | -0.689 |
| <i>Fh</i>      | -0.256 | -0.187 | -0.247 |
| <i>Fndc5</i>   | -0.418 | -0.708 | -0.488 |
| <i>Foxj3</i>   | 0.295  | 0.297  | 0.344  |
| <i>Foxm1</i>   | -0.65  | -0.884 | -0.656 |
| <i>Foxn3</i>   | 0.177  | 0.263  | 0.296  |
| <i>Frs2</i>    | 0.231  | 0.426  | 0.336  |
| <i>Ftl1</i>    | -0.799 | -0.665 | -0.338 |
| <i>Fxyd5</i>   | -0.93  | -0.629 | -0.652 |
| <i>Fyco1</i>   | 0.162  | 0.176  | 0.278  |
| <i>Gabra1</i>  | 0.449  | 1.198  | 1.123  |
| <i>Gadd45b</i> | 0.32   | 0.334  | 0.295  |
| <i>Gas2</i>    | -0.64  | -0.955 | -0.476 |
| <i>Gas2l3</i>  | -1.72  | -1.106 | -0.494 |
| <i>Gdf15</i>   | -0.578 | -1.219 | -0.961 |
| <i>Gipc1</i>   | -0.657 | -0.431 | -0.345 |
| <i>Gja1</i>    | -0.437 | -0.424 | -0.494 |
| <i>Glb1l</i>   | -0.255 | -0.533 | -0.242 |

|                    |        |        |        |
|--------------------|--------|--------|--------|
| <i>Glb1l2</i>      | -0.325 | -0.553 | -0.634 |
| <i>Glis2</i>       | -0.213 | -0.4   | -0.32  |
| <i>Glrx5</i>       | -0.379 | -0.306 | -0.381 |
| <i>Gnaq</i>        | 0.195  | 0.505  | 0.33   |
| <i>Gnat2</i>       | -0.849 | -1.749 | -0.925 |
| <i>Gne</i>         | -0.279 | -0.254 | -0.23  |
| <i>Gnpda1</i>      | -0.547 | -0.919 | -0.402 |
| <i>Gopc</i>        | 0.213  | 0.281  | 0.331  |
| <i>Gosr2</i>       | -0.151 | -0.341 | -0.215 |
| <i>Got2</i>        | -0.334 | -0.361 | -0.368 |
| <i>Gpbp1</i>       | 0.327  | 0.34   | 0.281  |
| <i>Gpcpd1</i>      | 0.25   | 0.209  | 0.301  |
| <i>Gpnmb</i>       | -1.841 | -1.117 | -0.667 |
| <i>Gpr146</i>      | 0.251  | 0.481  | 0.44   |
| <i>Gprc5a</i>      | -0.926 | -1.184 | -0.826 |
| <i>Grk5</i>        | 0.338  | 0.288  | 0.26   |
| <i>Gxylt1</i>      | 0.17   | 0.348  | 0.327  |
| <i>H2afx</i>       | -1.026 | -0.743 | -0.55  |
| <i>Hao1</i>        | -1.446 | -1.589 | -1.001 |
| <i>Havcr1</i>      | -4.047 | -3.558 | -3.712 |
| <i>Hdac9</i>       | -0.279 | -0.242 | -0.357 |
| <i>Helz</i>        | 0.329  | 0.211  | 0.208  |
| <i>Hgd</i>         | -0.428 | -0.662 | -0.582 |
| <i>Hipk3</i>       | 0.301  | 0.218  | 0.262  |
| <i>Hist1h1a</i>    | -0.717 | -0.516 | -0.471 |
| <i>Hist1h2ah</i>   | -1.559 | -0.908 | -0.463 |
| <i>Hist1h2ai</i>   | -1.553 | -0.958 | -0.805 |
| <i>Hist1h2bcl1</i> | -0.841 | -0.686 | -0.586 |
| <i>Hist1h2bf</i>   | -1.259 | -0.781 | -0.803 |
| <i>Hist1h2bk</i>   | -0.554 | -0.436 | -0.422 |
| <i>Hist1h3a</i>    | -1.173 | -0.837 | -0.677 |
| <i>Hist1h4a</i>    | -0.928 | -0.335 | -0.371 |
| <i>Hist2h4</i>     | -1.567 | -0.839 | -0.996 |
| <i>Hjulp</i>       | -1.335 | -0.952 | -0.79  |
| <i>Hmbox1</i>      | 0.254  | 0.529  | 0.388  |
| <i>Hmgxb3</i>      | -0.183 | -0.245 | -0.132 |
| <i>Hmmr</i>        | -1.556 | -0.971 | -0.848 |
| <i>Hnf1a</i>       | -0.403 | -0.666 | -0.621 |
| <i>Homer3</i>      | -0.22  | -0.207 | -0.185 |
| <i>Hook2</i>       | -0.51  | -1.127 | -0.628 |
| <i>Hsd17b4</i>     | -0.381 | -0.272 | -0.375 |
| <i>Hspa14</i>      | -0.252 | -0.308 | -0.178 |
| <i>Hspg2</i>       | -0.623 | -0.895 | -0.321 |
| <i>Htra3</i>       | -1.592 | -0.799 | -1.51  |
| <i>Ifitm2</i>      | -0.589 | -0.258 | -0.32  |
| <i>Ift81</i>       | 0.217  | 0.255  | 0.126  |

|                     |        |        |        |
|---------------------|--------|--------|--------|
| <i>Il18rap</i>      | 0.675  | 1.07   | 1.033  |
| <i>Iqgap3</i>       | -1.609 | -1.024 | -0.658 |
| <i>Jun</i>          | 0.25   | 0.575  | 0.125  |
| <i>Kctd17</i>       | -0.354 | -0.806 | -0.371 |
| <i>Kdm4c</i>        | 0.153  | 0.16   | 0.145  |
| <i>Kif11</i>        | -0.854 | -0.768 | -0.584 |
| <i>Kif12</i>        | -0.385 | -0.906 | -0.816 |
| <i>Kif14</i>        | -0.772 | -0.483 | -0.478 |
| <i>Kif18a</i>       | -0.864 | -0.551 | -0.524 |
| <i>Kif18b</i>       | -1.166 | -0.976 | -0.608 |
| <i>Kif1b</i>        | 0.145  | 0.088  | 0.232  |
| <i>Kif20a</i>       | -1.514 | -1.055 | -0.839 |
| <i>Kif20b</i>       | -1.001 | -0.482 | -0.494 |
| <i>Kif23</i>        | -1.161 | -0.96  | -0.52  |
| <i>Kif2c</i>        | -1.257 | -1.019 | -0.865 |
| <i>Kif4a</i>        | -1.348 | -1.27  | -0.564 |
| <i>Kifc2</i>        | -0.213 | -0.397 | -0.492 |
| <i>Klhl9</i>        | 0.172  | 0.751  | 0.326  |
| <i>Kmt2e</i>        | 0.223  | 0.335  | 0.248  |
| <i>Kmt5b</i>        | 0.209  | 0.275  | 0.151  |
| <i>Kn11</i>         | -1.811 | -0.974 | -0.669 |
| <i>Knstrn</i>       | -1.221 | -0.695 | -0.555 |
| <i>Kntc1</i>        | -1.044 | -0.706 | -0.496 |
| <i>Krt35</i>        | 0.769  | 0.833  | 0.365  |
| <i>Lactb2</i>       | -0.485 | -0.347 | -0.473 |
| <i>Lamb1</i>        | -0.416 | -0.29  | -0.616 |
| <i>Lamb2</i>        | 0.133  | 0.155  | 0.271  |
| <i>Lats1</i>        | 0.304  | 0.284  | 0.306  |
| <i>Lats2</i>        | 0.435  | 0.184  | 0.334  |
| <i>Lemd3</i>        | 0.287  | 0.389  | 0.28   |
| <i>Lgals1</i>       | -0.658 | -1.012 | -0.408 |
| <i>Lgals3</i>       | -1.701 | -0.881 | -0.529 |
| <i>Lif</i>          | -0.506 | -1.013 | -0.629 |
| <i>Lifr</i>         | 0.382  | 0.943  | 0.572  |
| <i>Lima1</i>        | 0.224  | 0.268  | 0.284  |
| <i>Lmna</i>         | -0.438 | -0.486 | -0.349 |
| <i>LOC100359668</i> | -0.449 | -0.959 | -0.453 |
| <i>LOC100360087</i> | -0.807 | -0.737 | -0.456 |
| <i>LOC100362606</i> | -0.424 | -0.54  | -0.303 |
| <i>LOC100363177</i> | -0.813 | -1.085 | -0.445 |
| <i>LOC100364016</i> | -1.723 | -1.031 | -0.548 |
| <i>LOC100912338</i> | -0.528 | -0.312 | -0.57  |
| <i>LOC102551340</i> | 0.559  | 1.22   | 0.545  |
| <i>LOC102555086</i> | -0.359 | -0.623 | -0.248 |
| <i>LOC102555377</i> | 0.422  | 0.404  | 0.488  |
| <i>LOC680498</i>    | -0.74  | -0.654 | -0.462 |



|                  |        |        |        |
|------------------|--------|--------|--------|
| <i>LOC684841</i> | -1.103 | -0.835 | -0.461 |
| <i>LOC688389</i> | -0.458 | -0.89  | -0.507 |
| <i>LOC688553</i> | -1.006 | -1.163 | -0.891 |
| <i>LOC691135</i> | 0.497  | 0.476  | 0.678  |
| <i>Lpcat1</i>    | 0.31   | 0.515  | 0.351  |
| <i>Lrch3</i>     | 0.291  | 0.197  | 0.252  |
| <i>Lrrc16a</i>   | -0.265 | -0.756 | -0.356 |
| <i>Lrrn1</i>     | 0.377  | 1.224  | 1.342  |
| <i>Luzp1</i>     | 0.392  | 0.312  | 0.324  |
| <i>Lysmd3</i>    | 0.299  | 0.327  | 0.366  |
| <i>Lyst</i>      | 0.191  | 0.362  | 0.253  |
| <i>Mab21l3</i>   | -0.487 | -1.462 | -0.947 |
| <i>Mafk</i>      | 0.284  | 0.261  | 0.259  |
| <i>Magi1</i>     | 0.249  | 0.245  | 0.195  |
| <i>Man1a1</i>    | 0.522  | 0.283  | 0.318  |
| <i>Mcm10</i>     | -0.96  | -0.693 | -0.319 |
| <i>Mcoln1</i>    | -0.298 | -0.197 | -0.177 |
| <i>Med13</i>     | 0.113  | 0.28   | 0.21   |
| <i>Meis2</i>     | 0.142  | 0.519  | 0.217  |
| <i>Melk</i>      | -1.089 | -0.774 | -0.654 |
| <i>Mettl10</i>   | 0.224  | 0.255  | 0.201  |
| <i>Mettl14</i>   | 0.179  | 0.266  | 0.238  |
| <i>Mgp</i>       | -0.384 | -0.376 | -0.232 |
| <i>Mir23a</i>    | -0.742 | -1.621 | -0.954 |
| <i>Mlph</i>      | -0.772 | -1.334 | -0.58  |
| <i>Mmp28</i>     | -0.873 | -0.69  | -0.403 |
| <i>Mmp8</i>      | 0.693  | 0.977  | 1.092  |
| <i>Mns1</i>      | -0.348 | -0.438 | -0.428 |
| <i>Mob3b</i>     | -0.482 | -0.56  | -0.635 |
| <i>Mroh1</i>     | -0.242 | -0.52  | -0.403 |
| <i>Mrpl37</i>    | -0.306 | -0.609 | -0.289 |
| <i>Msl2</i>      | 0.218  | 0.334  | 0.27   |
| <i>Mt1m</i>      | -1.382 | -1.165 | -0.754 |
| <i>Mterf1</i>    | 0.181  | 0.311  | 0.094  |
| <i>Mtf2</i>      | 0.262  | 0.573  | 0.268  |
| <i>Mtmr11</i>    | -0.285 | -0.528 | -0.545 |
| <i>Mxra8</i>     | -0.407 | -0.709 | -0.27  |
| <i>Myadm</i>     | -0.45  | -0.507 | -0.239 |
| <i>Mybl2</i>     | -0.624 | -0.446 | -0.577 |
| <i>Mybpc2</i>    | -0.58  | -1.093 | -0.639 |
| <i>Myo9a</i>     | 0.305  | 0.176  | 0.221  |
| <i>Nabp1</i>     | -0.375 | -1.069 | -0.623 |
| <i>Nagk</i>      | -0.304 | -0.528 | -0.394 |
| <i>Naprt</i>     | -0.42  | -0.398 | -0.407 |
| <i>Nasp</i>      | -0.413 | -0.503 | -0.345 |
| <i>Ncapd2</i>    | -0.532 | -0.695 | -0.546 |

|                |        |        |        |
|----------------|--------|--------|--------|
| <i>Ncapd3</i>  | -0.279 | -0.447 | -0.203 |
| <i>Ncapg</i>   | -1.492 | -1.293 | -0.751 |
| <i>Ncaph</i>   | -1.679 | -1.481 | -0.858 |
| <i>Ndc80</i>   | -1.513 | -0.751 | -0.591 |
| <i>Ndrg1</i>   | -0.798 | -0.594 | -0.532 |
| <i>Ndufa3</i>  | -0.38  | -0.467 | -0.546 |
| <i>Nefm</i>    | -0.597 | -1.429 | -0.675 |
| <i>Neil1</i>   | -0.49  | -0.603 | -0.418 |
| <i>Ninl</i>    | -0.766 | -1.41  | -0.664 |
| <i>Nipbl</i>   | 0.279  | 0.314  | 0.299  |
| <i>Nit1</i>    | -0.243 | -0.334 | -0.25  |
| <i>Nmnat3</i>  | -0.39  | -0.505 | -0.6   |
| <i>Notch1</i>  | 0.273  | 0.688  | 0.534  |
| <i>Npdc1</i>   | -0.393 | -0.569 | -0.245 |
| <i>Nr1h3</i>   | -0.484 | -0.687 | -0.234 |
| <i>Nrg1</i>    | -0.687 | -0.965 | -0.695 |
| <i>Nt5dc2</i>  | -0.557 | -0.806 | -0.315 |
| <i>Ntn4</i>    | 0.581  | 1.327  | 1.052  |
| <i>Nubp2</i>   | -0.353 | -0.313 | -0.278 |
| <i>Nuf2</i>    | -1.425 | -0.961 | -0.591 |
| <i>Nusap1</i>  | -1.393 | -0.797 | -0.622 |
| <i>Opcml</i>   | 0.885  | 0.646  | 0.771  |
| <i>Ophn1</i>   | 0.36   | 0.904  | 0.428  |
| <i>Orc3</i>    | 0.136  | 0.339  | 0.149  |
| <i>Otud4</i>   | 0.156  | 0.361  | 0.225  |
| <i>Oxct1</i>   | -0.335 | -0.375 | -0.453 |
| <i>P2ry10</i>  | 0.293  | 0.862  | 0.645  |
| <i>P2ry2</i>   | -0.609 | -0.902 | -0.776 |
| <i>Palm</i>    | -0.409 | -0.391 | -0.365 |
| <i>Parp3</i>   | -0.355 | -0.354 | -0.291 |
| <i>Pbx1</i>    | 0.346  | 0.514  | 0.473  |
| <i>Pcmt1</i>   | 0.348  | 0.316  | 0.165  |
| <i>PCOLCE2</i> | -0.802 | -0.993 | -0.864 |
| <i>Pdcd4</i>   | 0.315  | 0.67   | 0.299  |
| <i>Pdgfra</i>  | -0.536 | -0.804 | -0.368 |
| <i>Pdia5</i>   | 0.425  | 0.521  | 0.704  |
| <i>Pdlim7</i>  | -0.623 | -1.088 | -0.487 |
| <i>Pdpk1</i>   | 0.152  | 0.356  | 0.184  |
| <i>Pdzd2</i>   | 0.259  | 0.493  | 0.344  |
| <i>Pecr</i>    | -0.494 | -0.49  | -0.734 |
| <i>Pex16</i>   | -0.421 | -0.343 | -0.367 |
| <i>Pfn1</i>    | -0.319 | -0.359 | -0.211 |
| <i>Phb2</i>    | -0.336 | -0.194 | -0.247 |
| <i>Phf3</i>    | 0.171  | 0.171  | 0.171  |
| <i>Phip</i>    | 0.318  | 0.578  | 0.391  |
| <i>Pi16</i>    | -0.464 | -0.8   | -0.609 |

|                   |        |        |        |
|-------------------|--------|--------|--------|
| <i>Pias2</i>      | 0.238  | 0.412  | 0.242  |
| <i>Pla2g16</i>    | 0.265  | 0.342  | 0.236  |
| <i>Plcxd2</i>     | -0.636 | -0.824 | -0.631 |
| <i>Plekha3</i>    | 0.135  | 0.231  | 0.173  |
| <i>Plekha2</i>    | -0.275 | -0.252 | -0.217 |
| <i>Plk1</i>       | -1.599 | -1.077 | -0.61  |
| <i>Plp2</i>       | -0.6   | -0.439 | -0.269 |
| <i>Pls1</i>       | -0.537 | -0.566 | -0.575 |
| <i>Plxna4</i>     | 0.28   | 0.594  | 0.514  |
| <i>Pnlcd1</i>     | -0.384 | -0.523 | -0.467 |
| <i>Pnpla8</i>     | 0.3    | 0.361  | 0.259  |
| <i>Ppa2</i>       | -0.37  | -0.207 | -0.306 |
| <i>Ppef2</i>      | -0.633 | -0.527 | -0.94  |
| <i>Ppil4</i>      | 0.216  | 0.366  | 0.334  |
| <i>Ppm1j</i>      | -0.373 | -0.86  | -0.443 |
| <i>Ppp4r1</i>     | -0.229 | -0.16  | -0.136 |
| <i>Ppp4r2</i>     | 0.252  | 0.377  | 0.209  |
| <i>Ppp4r3b</i>    | 0.155  | 0.389  | 0.138  |
| <i>Pqlc3</i>      | -0.668 | -0.508 | -0.564 |
| <i>Prc1</i>       | -1.829 | -1.279 | -0.561 |
| <i>Prex2</i>      | 0.285  | 0.66   | 0.737  |
| <i>Prf1</i>       | 0.931  | 0.802  | 1.792  |
| <i>Prkab1</i>     | -0.268 | -0.375 | -0.283 |
| <i>Prkar2a</i>    | 0.238  | 0.314  | 0.219  |
| <i>Proser2</i>    | 0.48   | 0.641  | 0.53   |
| <i>Prpf18</i>     | 0.185  | 0.229  | 0.183  |
| <i>Prr11</i>      | -0.921 | -0.912 | -0.471 |
| <i>Prrc2c</i>     | 0.494  | 0.191  | 0.229  |
| <i>Psph</i>       | -0.333 | -0.752 | -0.321 |
| <i>Ptbp3</i>      | 0.236  | 0.323  | 0.25   |
| <i>Pthlh</i>      | -0.541 | -1.115 | -0.603 |
| <i>Ptpru</i>      | 0.522  | 0.454  | 0.49   |
| <i>Ptprz1</i>     | 1.341  | 1.1    | 1.3    |
| <i>Pttg1</i>      | -1.013 | -0.966 | -0.591 |
| <i>Pura</i>       | 0.251  | 0.424  | 0.337  |
| <i>Pxk</i>        | 0.273  | 0.222  | 0.235  |
| <i>Qdpr</i>       | -0.374 | -0.302 | -0.438 |
| <i>Qser1</i>      | 0.359  | 0.309  | 0.334  |
| <i>Rab11fip3</i>  | -0.276 | -0.754 | -0.34  |
| <i>Racgap1</i>    | -1.393 | -0.952 | -0.591 |
| <i>Rai14</i>      | 0.189  | 0.367  | 0.234  |
| <i>Rbms2</i>      | 0.334  | 0.375  | 0.324  |
| <i>Rc3h1</i>      | 0.309  | 0.287  | 0.288  |
| <i>Renbp</i>      | -0.384 | -1.45  | -0.36  |
| <i>RGD1306148</i> | 0.197  | 0.204  | 0.139  |
| <i>RGD1309534</i> | -0.288 | -0.429 | -0.395 |

|                   |        |        |        |
|-------------------|--------|--------|--------|
| <i>RGD1309730</i> | 0.279  | 0.304  | 0.216  |
| <i>RGD1562378</i> | -0.373 | -0.236 | -0.301 |
| <i>RGD1562451</i> | -0.644 | -0.715 | -0.652 |
| <i>RGD1562608</i> | 0.37   | 0.208  | 0.303  |
| <i>Rgs16</i>      | -1.174 | -0.704 | -1.241 |
| <i>Rgs6</i>       | 0.588  | 0.73   | 0.544  |
| <i>Rhoc</i>       | -0.44  | -0.427 | -0.316 |
| <i>Rhod</i>       | -0.411 | -0.532 | -0.387 |
| <i>Rnase6</i>     | 0.502  | 0.732  | 1.314  |
| <i>Rpp25</i>      | -0.749 | -1.202 | -0.807 |
| <i>Rprd2</i>      | 0.18   | 0.207  | 0.18   |
| <i>Rrm2</i>       | -1.503 | -1.304 | -0.769 |
| <i>Rsf1</i>       | 0.179  | 0.402  | 0.236  |
| <i>Samd15</i>     | 0.46   | 0.658  | 0.61   |
| <i>Sat2</i>       | -0.225 | -0.646 | -0.668 |
| <i>Sbno2</i>      | -0.375 | -0.574 | -0.203 |
| <i>Scai</i>       | 0.37   | 0.29   | 0.249  |
| <i>Scarf2</i>     | -0.56  | -0.569 | -0.284 |
| <i>Scly</i>       | -0.562 | -1.22  | -0.657 |
| <i>Sec63</i>      | 0.244  | 0.28   | 0.223  |
| <i>Sell</i>       | 0.681  | 1.44   | 1.502  |
| <i>Serinc2</i>    | -0.673 | -0.639 | -0.503 |
| <i>Serpib8</i>    | -0.447 | -0.618 | -0.561 |
| <i>Serpine1</i>   | -1.058 | -1.035 | -0.931 |
| <i>Serpine2</i>   | -0.632 | -0.913 | -0.441 |
| <i>Serpinf2</i>   | -0.53  | -0.322 | -0.497 |
| <i>Sgo1</i>       | -0.787 | -0.715 | -0.171 |
| <i>Sidt2</i>      | -0.224 | -0.166 | -0.202 |
| <i>Slc12a8</i>    | -0.318 | -0.437 | -0.358 |
| <i>Slc1a5</i>     | -0.477 | -0.36  | -0.425 |
| <i>Slc22a12</i>   | -0.409 | -0.801 | -0.537 |
| <i>Slc25a37</i>   | 0.431  | 0.285  | 0.262  |
| <i>Slc2a6</i>     | -0.624 | -0.555 | -0.399 |
| <i>Slc34a2</i>    | -0.894 | -1.281 | -1.187 |
| <i>Slc38a3</i>    | -0.764 | -0.687 | -0.705 |
| <i>Slc41a2</i>    | -0.388 | -0.878 | -0.386 |
| <i>Slc9a3r1</i>   | -0.434 | -0.498 | -0.419 |
| <i>Slc9a4</i>     | -0.628 | -0.419 | -0.495 |
| <i>Slmap</i>      | 0.331  | 0.456  | 0.277  |
| <i>Smg7</i>       | 0.279  | 0.431  | 0.321  |
| <i>Smim14</i>     | 0.19   | 0.461  | 0.307  |
| <i>Snap91</i>     | -0.404 | -0.719 | -0.397 |
| <i>Snrpa</i>      | -0.206 | -0.316 | -0.321 |
| <i>Sos1</i>       | 0.384  | 0.28   | 0.323  |
| <i>Sp4</i>        | 0.319  | 0.537  | 0.257  |
| <i>Spata13</i>    | 0.507  | 0.429  | 0.466  |

|                 |        |        |        |
|-----------------|--------|--------|--------|
| <i>Spcs2</i>    | 0.186  | 0.71   | 0.26   |
| <i>Spp1</i>     | -1.367 | -1.675 | -1.645 |
| <i>Srcin1</i>   | -0.349 | -1.042 | -0.571 |
| <i>Srebf1</i>   | -0.538 | -0.547 | -0.605 |
| <i>Stag1</i>    | 0.121  | 0.273  | 0.215  |
| <i>Stag2</i>    | 0.123  | 0.351  | 0.197  |
| <i>Stk38l</i>   | -0.3   | -0.432 | -0.506 |
| <i>Ston2</i>    | 0.316  | 0.416  | 0.275  |
| <i>Stx8</i>     | -0.543 | -0.741 | -0.475 |
| <i>Tagln</i>    | -1.537 | -1.993 | -0.57  |
| <i>Taok1</i>    | 0.181  | 0.132  | 0.203  |
| <i>Tbc1d1</i>   | -0.552 | -0.774 | -0.432 |
| <i>Tbc1d13</i>  | -0.271 | -0.372 | -0.251 |
| <i>Tbx10</i>    | -0.472 | -1.547 | -0.697 |
| <i>Tcea3</i>    | -0.411 | -0.611 | -0.69  |
| <i>Tceal9</i>   | -0.265 | -0.233 | -0.231 |
| <i>Tes</i>      | -0.654 | -0.389 | -0.506 |
| <i>Tff3</i>     | -0.726 | -1.021 | -0.808 |
| <i>Tgfbr3</i>   | 0.574  | 0.431  | 0.419  |
| <i>Tgm2</i>     | -0.437 | -0.343 | -0.212 |
| <i>Tgoln2</i>   | 0.141  | 0.265  | 0.169  |
| <i>Tmed8</i>    | 0.263  | 0.458  | 0.414  |
| <i>Tmem150a</i> | -0.204 | -0.46  | -0.29  |
| <i>Tmem183a</i> | -0.3   | -0.279 | -0.205 |
| <i>Tmem37</i>   | -0.528 | -1.054 | -0.446 |
| <i>Tmem47</i>   | 0.286  | 0.992  | 0.496  |
| <i>Tmem63b</i>  | -0.136 | -0.348 | -0.136 |
| <i>Tmppe</i>    | 0.283  | 0.483  | 0.445  |
| <i>Tmtc1</i>    | 0.363  | 0.207  | 0.391  |
| <i>Tnc</i>      | -1.169 | -1.224 | -1.041 |
| <i>Tnfsf10</i>  | 0.509  | 1.242  | 0.855  |
| <i>Top2a</i>    | -1.846 | -0.908 | -0.436 |
| <i>Topaz1</i>   | -0.715 | -0.806 | -0.799 |
| <i>Tpx2</i>     | -1.706 | -1.075 | -0.693 |
| <i>Trappc1</i>  | -0.469 | -0.513 | -0.373 |
| <i>Trem2</i>    | -0.874 | -0.782 | -0.549 |
| <i>Trib2</i>    | 0.22   | 0.511  | 0.208  |
| <i>Trim33</i>   | 0.278  | 0.229  | 0.216  |
| <i>Trip11</i>   | 0.206  | 0.438  | 0.298  |
| <i>Troap</i>    | -1.571 | -1.256 | -0.81  |
| <i>Ttc17</i>    | 0.186  | 0.399  | 0.285  |
| <i>Tubb6</i>    | -1.435 | -0.412 | -0.62  |
| <i>Tusc3</i>    | 0.201  | 0.247  | 0.128  |
| <i>Uap1l1</i>   | -0.454 | -1.125 | -0.409 |
| <i>Ube2t</i>    | -0.744 | -0.508 | -0.477 |
| <i>Ubqln4</i>   | -0.251 | -0.147 | -0.249 |

|                |        |        |        |
|----------------|--------|--------|--------|
| <i>Ufl1</i>    | 0.178  | 0.35   | 0.205  |
| <i>Ugcg</i>    | 0.745  | 0.587  | 0.5    |
| <i>Ugdh</i>    | -0.42  | -0.325 | -0.267 |
| <i>Uhrf1</i>   | -1.345 | -0.67  | -0.444 |
| <i>Unc5c</i>   | 0.641  | 0.677  | 0.511  |
| <i>Uqcrc1</i>  | -0.285 | -0.232 | -0.268 |
| <i>Usp25</i>   | 0.196  | 0.315  | 0.205  |
| <i>Usp48</i>   | 0.148  | 0.21   | 0.256  |
| <i>Vim</i>     | -0.192 | -0.485 | -0.274 |
| <i>Vps13a</i>  | 0.33   | 0.183  | 0.214  |
| <i>Vps29</i>   | -0.237 | -0.441 | -0.276 |
| <i>Wdr44</i>   | 0.294  | 0.279  | 0.269  |
| <i>Wdr72</i>   | -0.365 | -0.307 | -0.432 |
| <i>Wnk4</i>    | -0.449 | -1.105 | -0.869 |
| <i>Wwc3</i>    | 0.253  | 0.251  | 0.251  |
| <i>Xpnpep1</i> | -0.203 | -0.366 | -0.289 |
| <i>Xylb</i>    | -0.404 | -0.908 | -0.573 |
| <i>Ypel2</i>   | -0.561 | -0.299 | -0.424 |
| <i>Ywhae</i>   | -0.114 | -0.097 | -0.073 |
| <i>Zbtb10</i>  | 0.623  | 0.297  | 0.322  |
| <i>Zbtb11</i>  | 0.257  | 0.358  | 0.238  |
| <i>Zcchc11</i> | 0.304  | 0.281  | 0.21   |
| <i>Zcchc6</i>  | 0.199  | 0.31   | 0.33   |
| <i>Zdhhc17</i> | 0.147  | 0.438  | 0.172  |
| <i>Zeb1</i>    | 0.217  | 0.167  | 0.249  |
| <i>Zfp280c</i> | 0.187  | 0.233  | 0.239  |
| <i>Zfp280d</i> | 0.356  | 0.229  | 0.232  |
| <i>Zfp292</i>  | 0.363  | 0.498  | 0.251  |
| <i>Zfp354c</i> | 0.556  | 0.769  | 0.829  |
| <i>Zfp62</i>   | 0.187  | 0.372  | 0.203  |
| <i>Zfp638</i>  | 0.252  | 0.362  | 0.252  |
| <i>Zfp11</i>   | -0.2   | -0.346 | -0.181 |
| <i>Zhx1</i>    | 0.23   | 0.318  | 0.255  |
| <i>Zmynd11</i> | 0.273  | 0.273  | 0.153  |
| <i>Zwint</i>   | -0.27  | -0.341 | -0.378 |

**Supplemental Table 2 legend:** Log Fold changes( $\log_2$ ) for 538 genes expressed significantly differently (either up or down) between the TG.1K.ALD rats that developed FSGS and the three groups that were prevented by treatment from developing FSGS (TG.1K.CRD, TG.1K.Rapa and TG.1K.ACEi).

**Supplemental Table 3**

| GeneSymbol     | log <sub>2</sub> fc_CR.Adlib | log <sub>2</sub> fc_Rapa.Adlib | log <sub>2</sub> fc_ACE.Adlib | Categories in Table5 |
|----------------|------------------------------|--------------------------------|-------------------------------|----------------------|
| <i>Aurkb</i>   | -1.12                        | -1.07                          | -0.56                         | 1,2,3,4              |
| <i>Cenpe</i>   | -1.27                        | -0.84                          | -0.51                         | 1,2,3,4              |
| <i>Ndc80</i>   | -1.51                        | -0.75                          | -0.59                         | 1,2,3,4              |
| <i>Nuf2</i>    | -1.42                        | -0.96                          | -0.59                         | 1,2,3,4              |
| <i>Plk1</i>    | -1.60                        | -1.08                          | -0.61                         | 1,2,3,4              |
| <i>Bub1</i>    | -1.39                        | -0.96                          | -0.70                         | 1,2,3                |
| <i>Kif11</i>   | -0.85                        | -0.77                          | -0.58                         | 1,2,3                |
| <i>Sgo1</i>    | -0.79                        | -0.71                          | -0.17                         | 1,2,3                |
| <i>Tpx2</i>    | -1.71                        | -1.07                          | -0.69                         | 1,2,3                |
| <i>Zwint</i>   | -0.27                        | -0.34                          | -0.38                         | 1,2,3                |
| <i>Bub1b</i>   | -0.93                        | -0.81                          | -0.48                         | 2,3,4                |
| <i>Cdc20</i>   | -1.65                        | -0.82                          | -0.91                         | 2,3,4                |
| <i>Cdk1</i>    | -1.59                        | -0.68                          | -0.49                         | 2,3,4                |
| <i>Kif4a</i>   | -1.35                        | -1.27                          | -0.56                         | 2,3,4                |
| <i>Racgap1</i> | -1.39                        | -0.95                          | -0.59                         | 2,3,4                |
| <i>Ccnb1</i>   | -1.37                        | -1.06                          | -0.63                         | 1,3,4                |
| <i>Cdc14a</i>  | 0.41                         | 0.17                           | 0.18                          | 1,3,4                |
| <i>Lats1</i>   | 0.30                         | 0.28                           | 0.31                          | 1,3,4                |
| <i>Nusap1</i>  | -1.39                        | -0.80                          | -0.62                         | 1,3,4                |
| <i>Pttg1</i>   | -1.01                        | -0.97                          | -0.59                         | 1,3,4                |
| <i>Top2a</i>   | -1.85                        | -0.91                          | -0.44                         | 1,3,4                |
| <i>Cenpi</i>   | -0.40                        | -0.38                          | -0.30                         | 2,3                  |
| <i>Csnk1a1</i> | 0.09                         | 0.14                           | 0.13                          | 2,3                  |
| <i>Dctn2</i>   | -0.20                        | -0.18                          | -0.22                         | 2,3                  |
| <i>Kn11</i>    | -1.81                        | -0.97                          | -0.67                         | 2,3                  |
| <i>Kntc1</i>   | -1.04                        | -0.71                          | -0.50                         | 2,3                  |
| <i>Mybl2</i>   | -0.62                        | -0.45                          | -0.58                         | 2,3                  |
| <i>Pdlim7</i>  | -0.62                        | -1.09                          | -0.49                         | 2,3                  |
| <i>Pura</i>    | 0.25                         | 0.42                           | 0.34                          | 2,3                  |
| <i>Ccna2</i>   | -1.11                        | -0.73                          | -0.38                         | 1,3                  |
| <i>Cenpf</i>   | -1.46                        | -1.05                          | -0.91                         | 1,3                  |
| <i>Cenpt</i>   | -0.51                        | -0.60                          | -0.44                         | 1,3                  |
| <i>Kif2c</i>   | -1.26                        | -1.02                          | -0.87                         | 1,3                  |
| <i>Ninl</i>    | -0.77                        | -1.41                          | -0.66                         | 1,3                  |
| <i>Bcl2</i>    | 0.28                         | 0.86                           | 0.46                          | 3,4                  |
| <i>Lats2</i>   | 0.44                         | 0.18                           | 0.33                          | 3,4                  |

|                  |       |       |       |     |
|------------------|-------|-------|-------|-----|
| <i>Ect2</i>      | -1.60 | -0.95 | -0.59 | 1,4 |
| <i>Hmnr</i>      | -1.56 | -0.97 | -0.85 | 1,4 |
| <i>Lmna</i>      | -0.44 | -0.49 | -0.35 | 1,4 |
| <i>Ncapd2</i>    | -0.53 | -0.70 | -0.55 | 1,4 |
| <i>Stag1</i>     | 0.12  | 0.27  | 0.21  | 1,4 |
| <i>Cd2ap</i>     | 0.53  | 0.31  | 0.29  | 4   |
| <i>Diaph3</i>    | -1.62 | -1.24 | -0.74 | 4   |
| <i>Gipc1</i>     | -0.66 | -0.43 | -0.34 | 4   |
| <i>Kif14</i>     | -0.77 | -0.48 | -0.48 | 4   |
| <i>Kif20a</i>    | -1.51 | -1.05 | -0.84 | 4   |
| <i>Kif20b</i>    | -1.00 | -0.48 | -0.49 | 4   |
| <i>Kif23</i>     | -1.16 | -0.96 | -0.52 | 4   |
| <i>Klhl9</i>     | 0.17  | 0.75  | 0.33  | 4   |
| <i>mir-23</i>    | -0.74 | -1.62 | -0.95 | 4   |
| <i>Pfn1</i>      | -0.32 | -0.36 | -0.21 | 4   |
| <i>Prc1</i>      | -1.83 | -1.28 | -0.56 | 4   |
| <i>Rab11fip3</i> | -0.28 | -0.75 | -0.34 | 4   |
| <i>Rhoc</i>      | -0.44 | -0.43 | -0.32 | 4   |
| <i>Topaz1</i>    | -0.71 | -0.81 | -0.80 | 4   |
| <i>Bmp2</i>      | -0.63 | -1.32 | -0.57 | 3   |
| <i>Cdc25c</i>    | -0.53 | -0.66 | -0.48 | 3   |
| <i>Clasp2</i>    | 0.18  | 0.37  | 0.22  | 3   |
| <i>Dlgap5</i>    | -1.47 | -0.80 | -0.68 | 3   |
| <i>Dynlt3</i>    | 0.17  | 0.28  | 0.17  | 3   |
| <i>Fbxw5</i>     | -0.31 | -0.33 | -0.21 | 3   |
| <i>Foxm1</i>     | -0.65 | -0.88 | -0.66 | 3   |
| <i>Gadd45b</i>   | 0.32  | 0.33  | 0.30  | 3   |
| <i>Jun</i>       | 0.25  | 0.58  | 0.13  | 3   |
| <i>Kif18a</i>    | -0.86 | -0.55 | -0.52 | 3   |
| <i>Kif18b</i>    | -1.17 | -0.98 | -0.61 | 3   |
| <i>Nrg1</i>      | -0.69 | -0.96 | -0.70 | 3   |
| <i>Pdgfra</i>    | -0.54 | -0.80 | -0.37 | 3   |
| <i>Phb2</i>      | -0.34 | -0.19 | -0.25 | 3   |
| <i>Phip</i>      | 0.32  | 0.58  | 0.39  | 3   |
| <i>Pthlh</i>     | -0.54 | -1.12 | -0.60 | 3   |
| <i>Slc9a3r1</i>  | -0.43 | -0.50 | -0.42 | 3   |
| <i>Spp1</i>      | -1.37 | -1.68 | -1.65 | 3   |
| <i>Tnc</i>       | -1.17 | -1.22 | -1.04 | 3   |
| <i>Trim33</i>    | 0.28  | 0.23  | 0.22  | 3   |
| <i>Ywhae</i>     | -0.11 | -0.10 | -0.07 | 3   |
| <i>Atrx</i>      | 0.26  | 0.29  | 0.34  | 1   |



|               |       |       |       |   |
|---------------|-------|-------|-------|---|
| <i>Ccnb2</i>  | -2.03 | -1.72 | -0.70 | 1 |
| <i>Hjurp</i>  | -1.33 | -0.95 | -0.79 | 1 |
| <i>Kmt5b</i>  | 0.21  | 0.27  | 0.15  | 1 |
| <i>Knstrn</i> | -1.22 | -0.70 | -0.56 | 1 |
| <i>Ncapd3</i> | -0.28 | -0.45 | -0.20 | 1 |
| <i>Ncapg</i>  | -1.49 | -1.29 | -0.75 | 1 |
| <i>Stag2</i>  | 0.12  | 0.35  | 0.20  | 1 |

**Supplemental Table 3 legend:** Subset of the 538 genes shown in Supplemental Table 2 as identified in Table 5 by Ingenuity Pathway Analysis as related to cell cycling.
